# Supplementary material for: Transcription Start Site Associated RNAs (TSSaRNAs) Are Ubiquitous in All Domains of Life
Source: PubMed Central journal article supplement (PMC4169567; doi:10.1371/journal.pone.0107680), 2014-09-19
Supplement: pone.0107680.s003.pdf [file pone.0107680.s003.pdf]

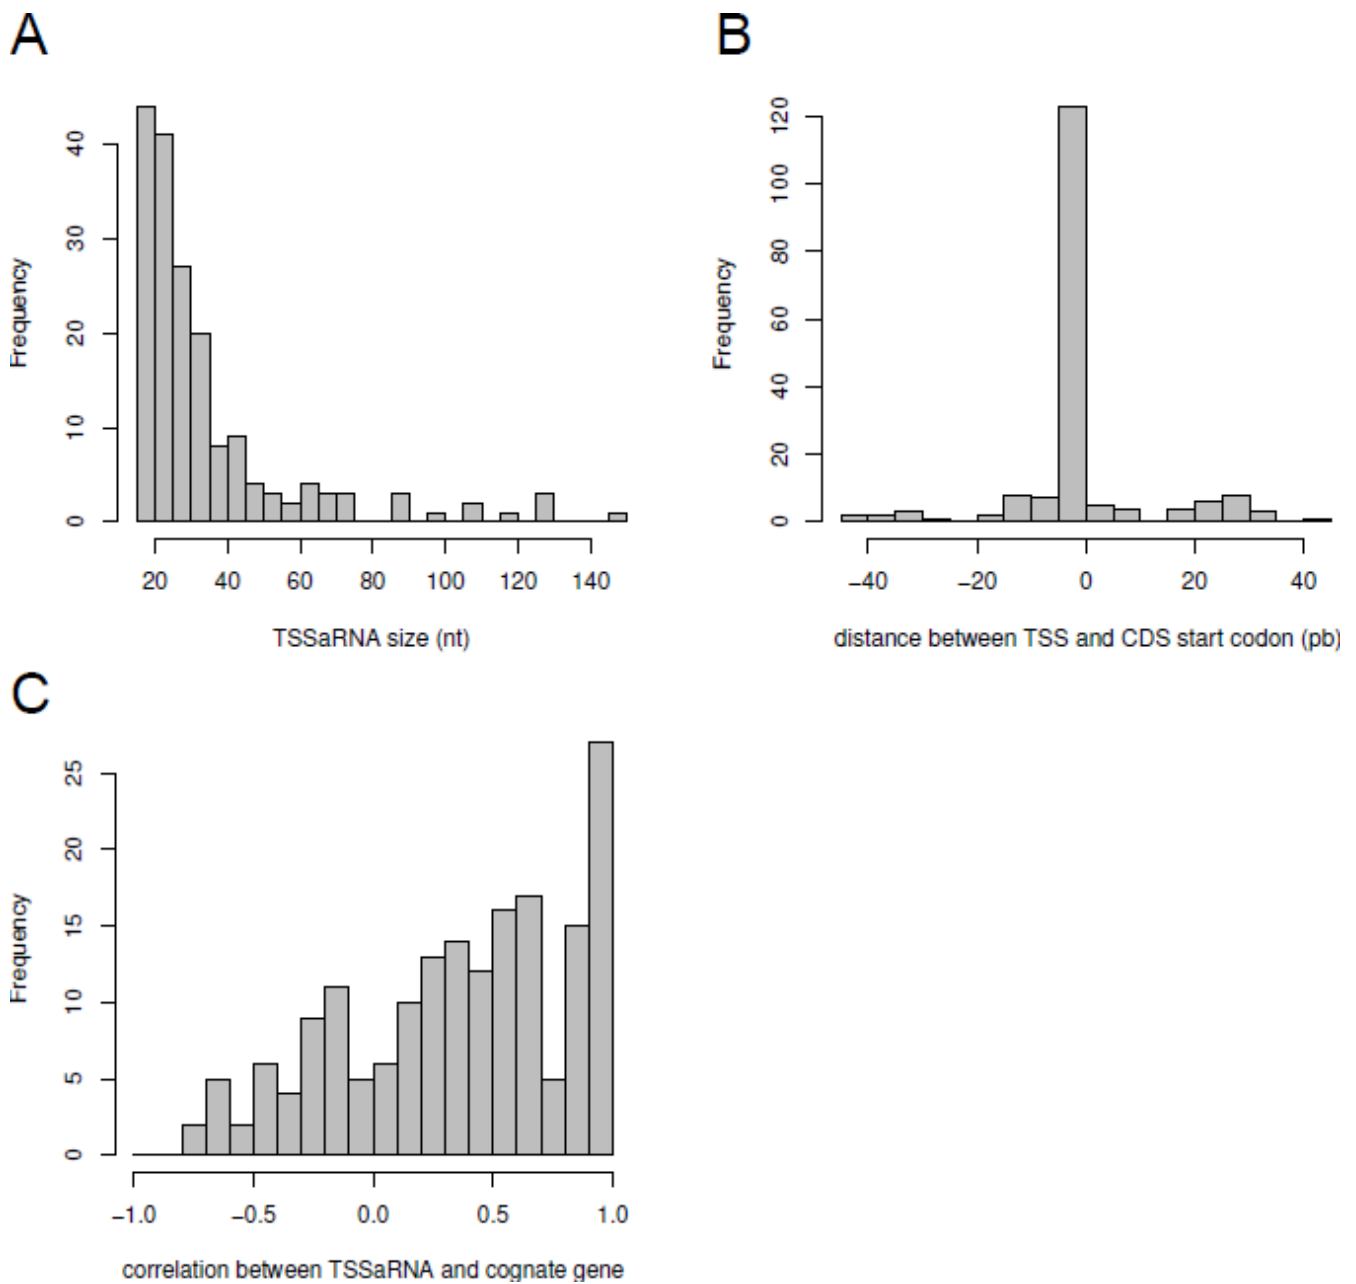

**Figure S3 – Properties of the 179 TSSaRNAs identified by small RNA-seq and dRNA-seq. A –** Size distribution. **B –** Distribution of the distances between TSSaRNA start position and cognate gene CDSs start codon position. **C –** Distribution of Pearson correlation between each TSSaRNA and its cognate gene.
