# Supplementary material for: Transcription Start Site Associated RNAs (TSSaRNAs) Are Ubiquitous in All Domains of Life
Source: PubMed Central journal article supplement (PMC4169567; doi:10.1371/journal.pone.0107680), 2014-09-19
Supplement: pone.0107680.s004.pdf [file pone.0107680.s004.pdf]

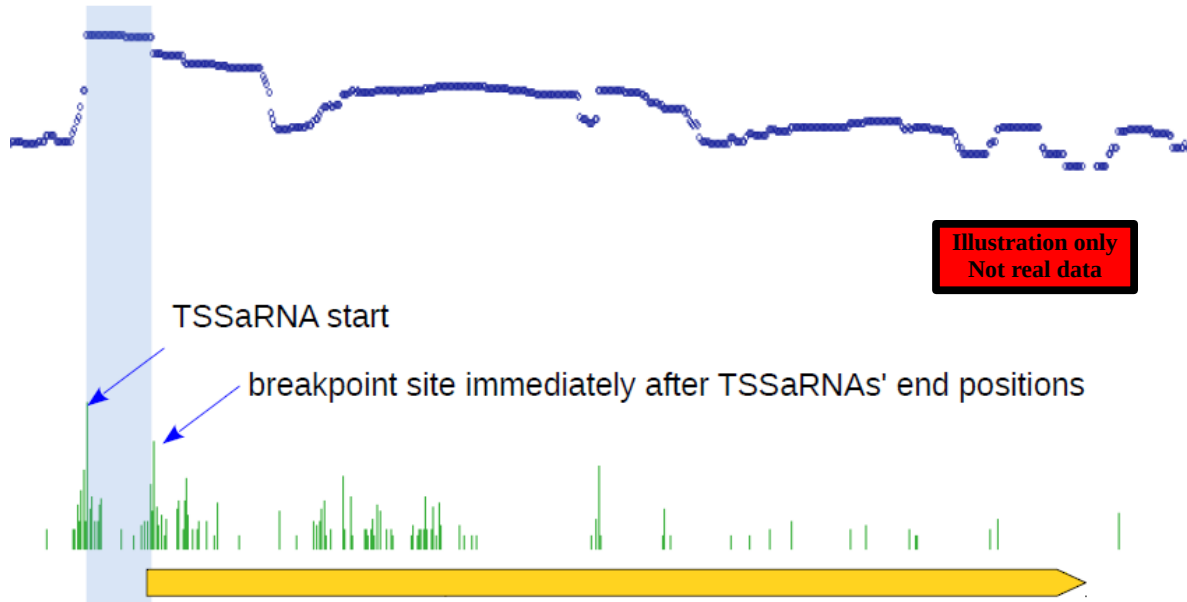

**Figure S4 – Schematic illustration of a putative signature if non-degradative processing biogenesis hypotheses would hold.** Dark blue points represent RNA-seq reads coverage data. The yellow arrow represents a gene. Green vertical bars represent mapped reads start positions along genome coordinates and their abundances. Light blue highlight represents TSSaRNA sequence region. The prediction illustrated by the figure **is not** found in *H.salinarum* sequencing experiments.
