# Supplementary material for: Transcription Start Site Associated RNAs (TSSaRNAs) Are Ubiquitous in All Domains of Life
Source: PubMed Central journal article supplement (PMC4169567; doi:10.1371/journal.pone.0107680), 2014-09-19
Supplement: pone.0107680.s005.pdf [file pone.0107680.s005.pdf]

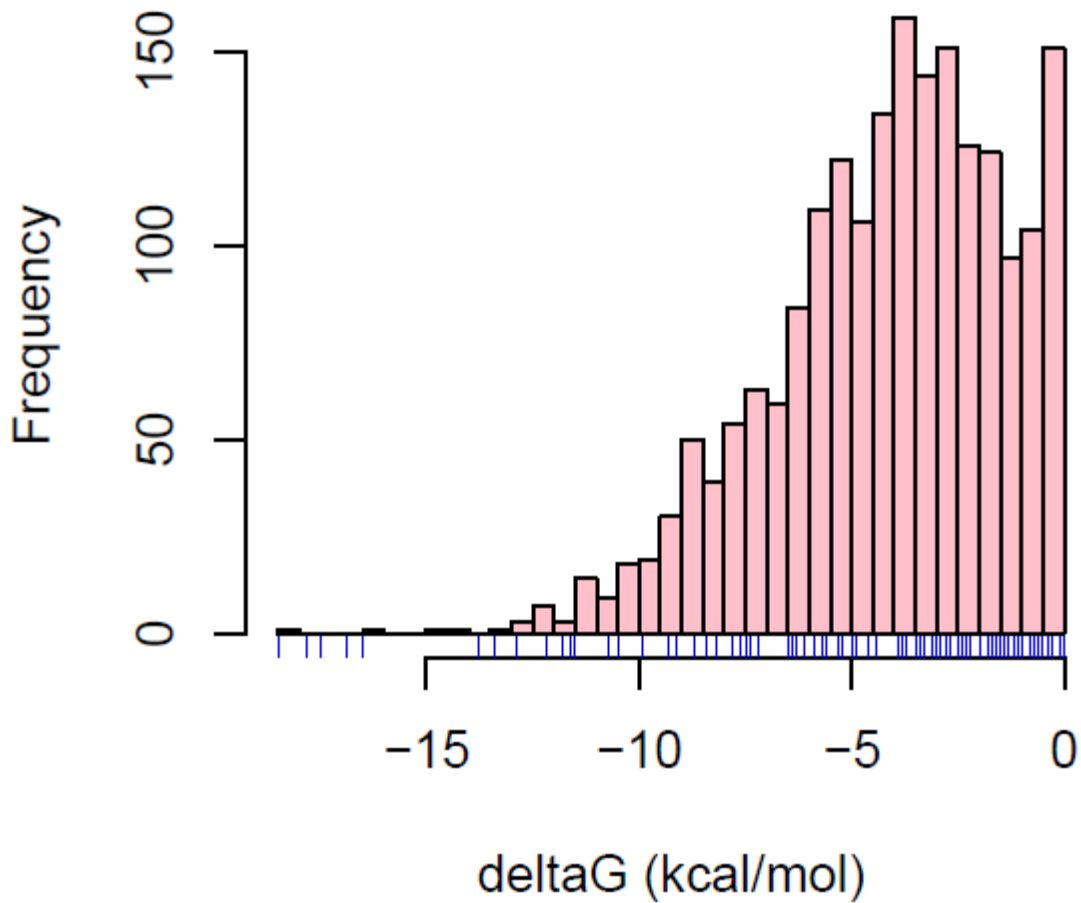

**Figure S5 – Gibbs Free Energy distribution of secondary structure predictions for TSSaRNAs and regular near-TSS sequences.** Histogram considers non-cognate genes sequences with similar localization and same size as the TSSaRNA median sizes. Vertical blue bars represent values for actual TSSaRNA sequences.
