# Supplementary material for: Transcription Start Site Associated RNAs (TSSaRNAs) Are Ubiquitous in All Domains of Life
Source: PubMed Central journal article supplement (PMC4169567; doi:10.1371/journal.pone.0107680), 2014-09-19
Supplement: pone.0107680.s007.pdf [file pone.0107680.s007.pdf]

TSSaRNA-VNG0249G

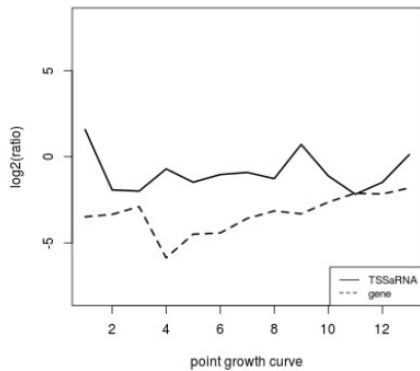

TSSaRNA-VNG0650C

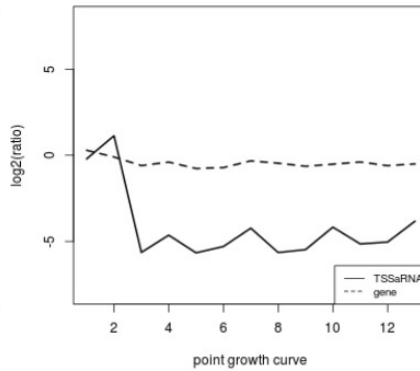

TSSaRNA-VNG2246H

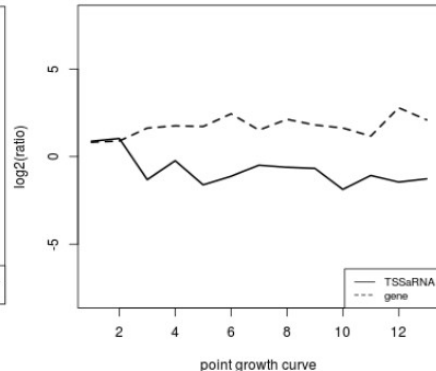

TSSaRNA-VNG0999H

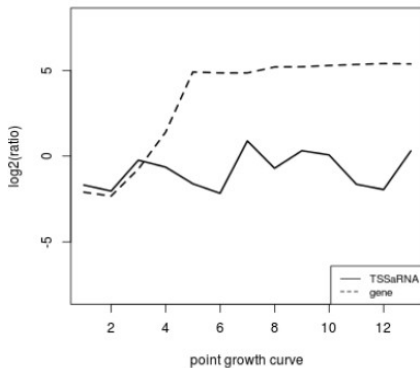

TSSaRNA-VNG1213C

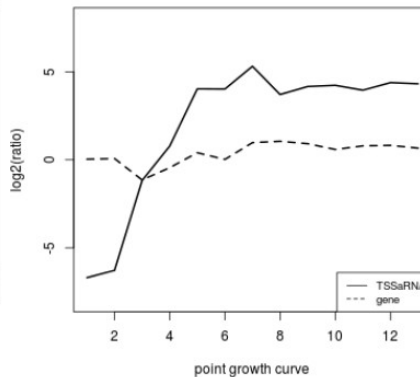

TSSaRNA-VNG1589C

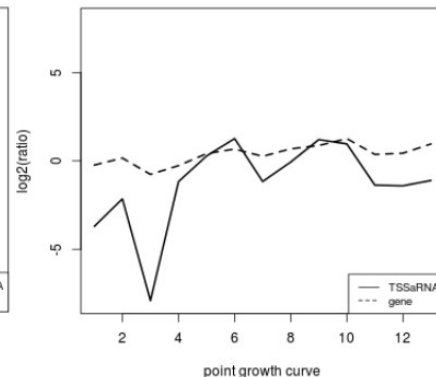

TSSaRNA-VNG2537G

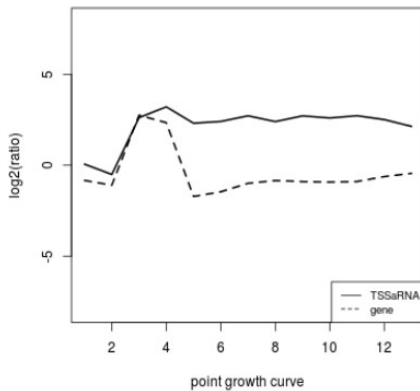

TSSaRNA-VNG1380H

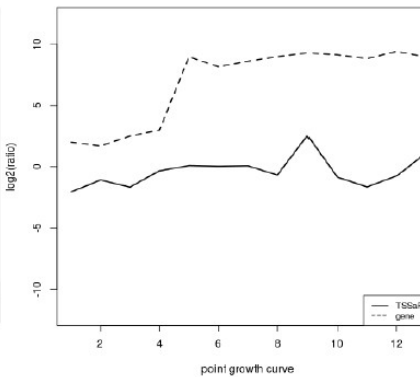

TSSaRNA-VNG2508C

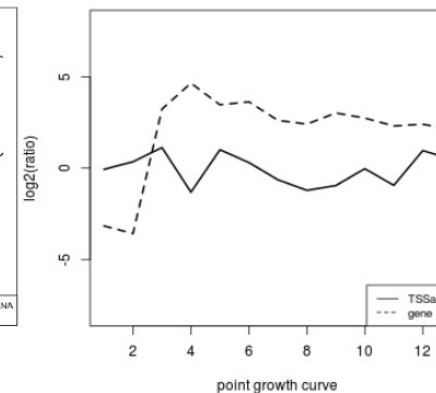

TSSaRNA-VNG6194H

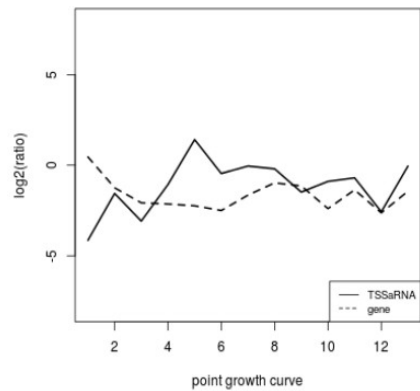

**Figure S7 – Expression profiles of TSSaRNAs differentially expressed over a typical growth-curve relative to the control growth condition.** Horizontal axis represent 13 growth curve points from different phases in a standard laboratory batch culture. Solid lines are TSSaRNA expression profiles and dashed lines their cognate gene expression profile.
