# Supplementary material for: Transcription Start Site Associated RNAs (TSSaRNAs) Are Ubiquitous in All Domains of Life
Source: PubMed Central journal article supplement (PMC4169567; doi:10.1371/journal.pone.0107680), 2014-09-19
Supplement: pone.0107680.s010.pdf [file pone.0107680.s010.pdf]

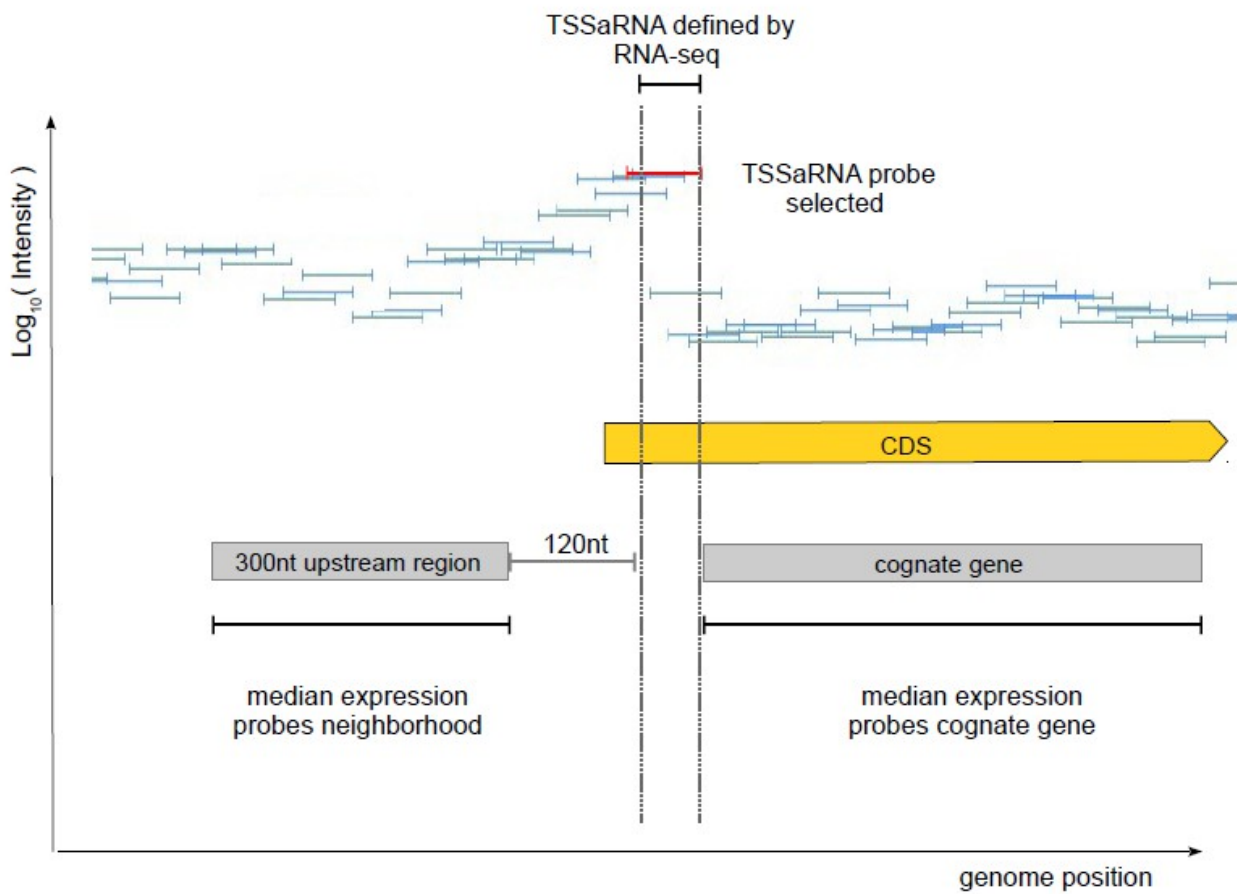

**Figure S10 – Illustration of the probe selection for TSSaRNA differential expression analysis.** Light blue horizontal bars illustrate tiling array probe intensities for the reference condition. The best probe that represent the TSSaRNA is highlighted in red. The yellow arrow represents a cognate gene. Black dashed lines represent the TSSaRNA boundaries defined by RNA-seq. Gray boxes represent the regions used to calculate the neighbourhood expression intensity, which was compared to the TSSaRNA probe.
